# Supplementary material for: Framework-aware query orchestration for Angular micro-frontends: a type-safe approach to GraphQL deduplication and performance optimization
Source: PeerJ journal article supplement (doi:10.7717/peerj-cs.3650), 2026-02-24
Supplement: Table_A1.docx [file Table_A1.docx]

**Table A1: Time-to-Interactive (TTI) performance metrics (seconds)**

| **Metric** | **Before (s)** | **After (s)** |
| --- | --- | --- |
| **Average TTI** | **3.5** | **1.8** |
| **Initial Route Load** | **2.8** | **1.2** |
| **Route Transition** | **1.9** | **0.7** |
