# Supplementary material for: Framework-aware query orchestration for Angular micro-frontends: a type-safe approach to GraphQL deduplication and performance optimization
Source: PeerJ journal article supplement (doi:10.7717/peerj-cs.3650), 2026-02-24
Supplement: Table_A2.docx [file Table_A2.docx]

**Table A2: Bundle Size Comparison**

| **Component** | **Before (KB)** | **After (KB)** |
| --- | --- | --- |
| **Query Definitions** | **87** | **32** |
| **Generated Types** | **54** | **21** |
| **Runtime Dependencies** | **46** | **39** |
