# Supplementary material for: Framework-aware query orchestration for Angular micro-frontends: a type-safe approach to GraphQL deduplication and performance optimization
Source: PeerJ journal article supplement (doi:10.7717/peerj-cs.3650), 2026-02-24
Supplement: TableS1.docx [file TableS1.docx]

**Table 4: Type Error Reduction Metrics**

| **Metric** | **Reduction** |
| --- | --- |
| **Runtime GraphQL errors** | **92%** |
| **Schema migration defects** | **85%** |
| **Undefined field accesses** | **100%** |
