# Supplementary material for: Framework-aware query orchestration for Angular micro-frontends: a type-safe approach to GraphQL deduplication and performance optimization
Source: PeerJ journal article supplement (doi:10.7717/peerj-cs.3650), 2026-02-24
Supplement: TableS2.docx [file TableS2.docx]

**Table 6: Development Efficiency Metrics**

| **Metric** | **Improvement** |
| --- | --- |
| **Boilerplate code reduction** | **67%** |
| **Schema migration effort** | **75%** |
| **Implementation time** | **40%** |
