# Supplementary material for: Framework-aware query orchestration for Angular micro-frontends: a type-safe approach to GraphQL deduplication and performance optimization
Source: PeerJ journal article supplement (doi:10.7717/peerj-cs.3650), 2026-02-24
Supplement: TableS4.docx [file TableS4.docx]

**Table 7: Architectural Limitations and Compensations**

| **Limitation** | **Compensation Strategy** |
| --- | --- |
| **Build time scaling** | **Incremental analysis caching** |
| **Complex query handling** | **Selective optimization bypass** |
| **Mutation support** | **Hybrid Apollo Client integration** |
